# Supplementary material for: Kilo-scale synthesis and purification of 4,4′-[di-t-butyldibenzo]-18-crown-6 and its catalytic reduction to 4,4′-[di-t-butyldicyclohexano]-18-crown-6
Source: Royal Society of Chemistry journal article supplement (doi:10.1039/d2re00047d), 2022-01-01
Supplement: d2re00047d1.pdf [file d2re00047d1.pdf]

# Kilo scale synthesis and purification of 4,4'-[di t-butylidibenzo]-18-crown-6 and its catalytic reduction to 4,4'-[di t-butylidicyclohexano]-18-crown-6

Snehasis Dutta<sup>1\*</sup>, Trilochan Gadly<sup>2</sup>, Amey P. Wadawale<sup>3</sup>, Mayur Darekar<sup>1</sup>, Sulekha Mukhopadhyay<sup>1</sup>, Sunil K. Ghosh<sup>2</sup>, Birija S. Patro<sup>2</sup>

<sup>1</sup>Chemical Engineering Division, Bhabha Atomic Research Centre, Trombay, Mumbai 400085, Maharashtra, India

<sup>2</sup>Bio-Organic Division, Bhabha Atomic Research Centre, Trombay, Mumbai 400085, Maharashtra, India

<sup>3</sup>Chemistry Division, Bhabha Atomic Research Centre Mumbai, Trombay 400085

## Supplementary Material

### S1. <sup>1</sup>H-NMR Spectra

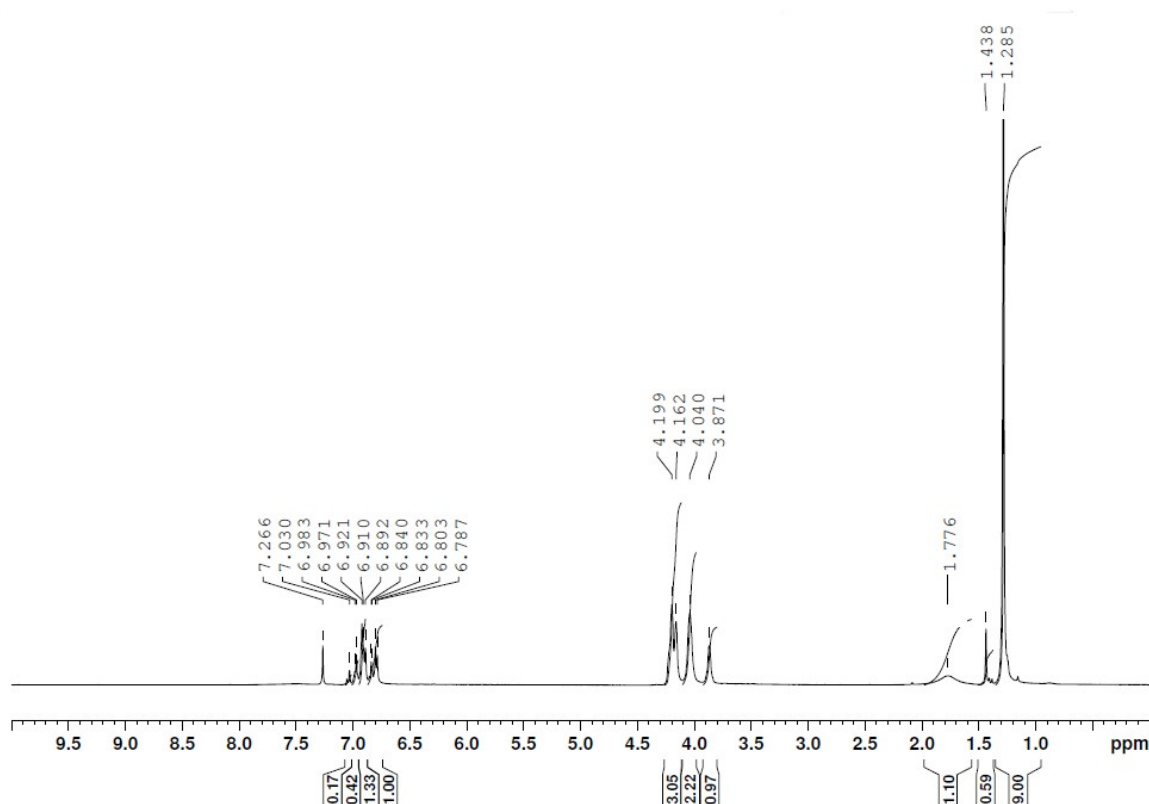

Fig S1. <sup>1</sup>H NMR Spectra of 4,4'-[di t-butylidibenzo]-18-crown-6

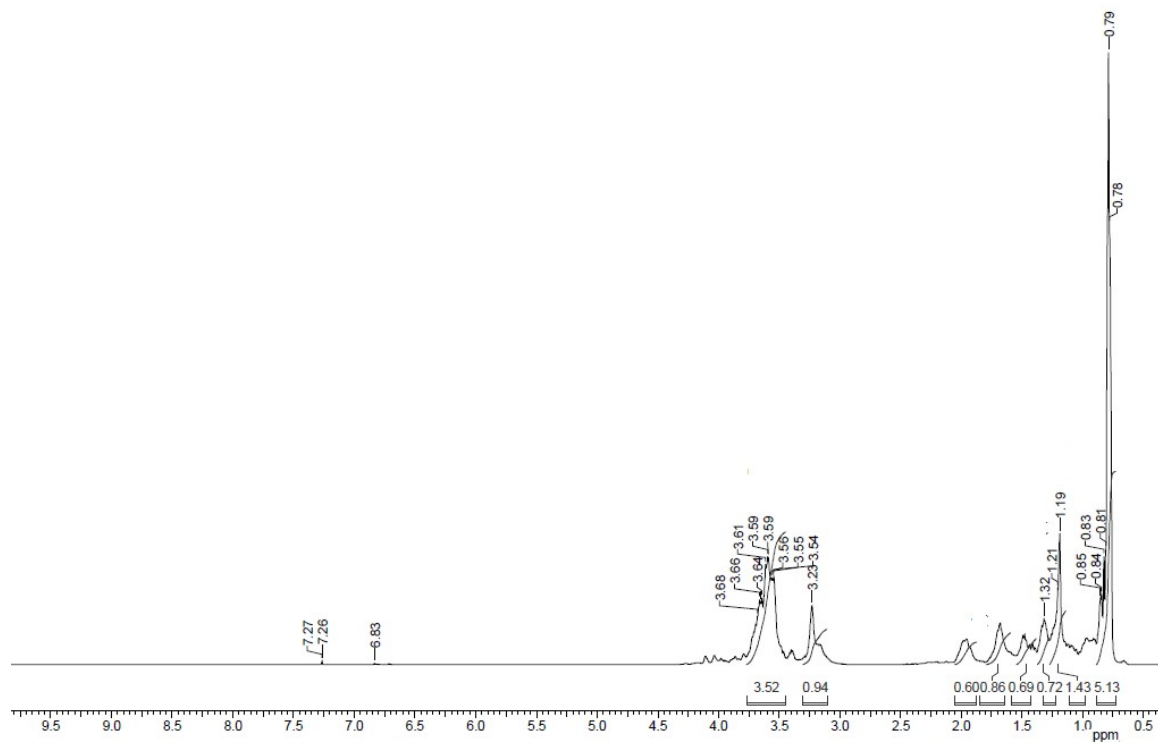

Fig S2.  $^1\text{H}$  NMR Spectra of 4,4'-[di t-butylidicyclohexano]-18-crown-6

## S2. IR Spectra

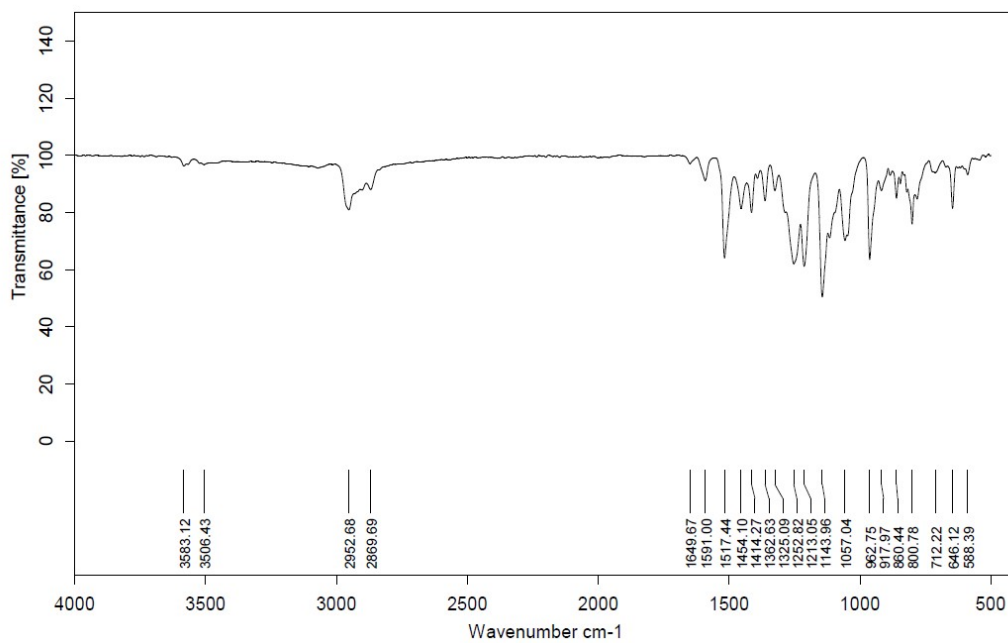

Fig S3. FTIR Spectra of 4,4'-[di t-butylidibenzo]-18-crown-6

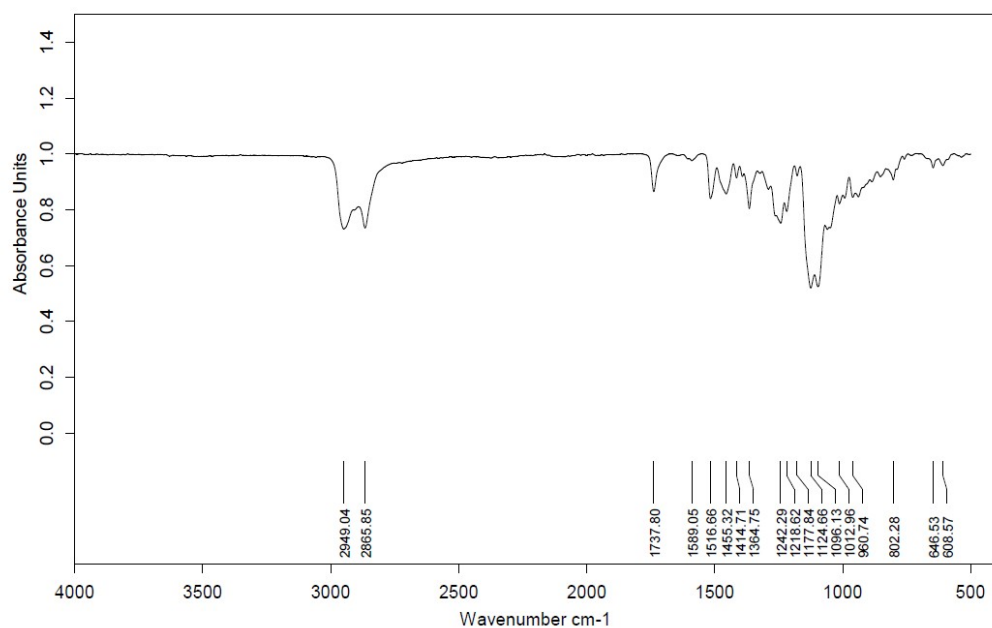

Fig S4. FTIR Spectra of 4,4'-[di t-butylidicyclohexano]-18-crown-6

### S3. Conditions of GCMS analysis

Table S1: Conditions observed for GCMS analysis

| SI No.        | Parameter                  | Description                                                                                                                                                                                                                                                                                                                                             |               |                |                              |   |     |   |    |     |   |   |     |    |   |     |   |
|---------------|----------------------------|---------------------------------------------------------------------------------------------------------------------------------------------------------------------------------------------------------------------------------------------------------------------------------------------------------------------------------------------------------|---------------|----------------|------------------------------|---|-----|---|----|-----|---|---|-----|----|---|-----|---|
| 1             | GC Model                   | Shimadzu GC-2010 Plus                                                                                                                                                                                                                                                                                                                                   |               |                |                              |   |     |   |    |     |   |   |     |    |   |     |   |
| 2             | GC Column nature           | Cross-bond, 5% diphenyl/ 95% dimethyl polysiloxane, 30 m, 0.25 mm (Restek Rxi 5ms Cat# 13423), Max and Min bleeding temp: 330-350 °C                                                                                                                                                                                                                    |               |                |                              |   |     |   |    |     |   |   |     |    |   |     |   |
| 3             | GC Pressure                | 73 kPa                                                                                                                                                                                                                                                                                                                                                  |               |                |                              |   |     |   |    |     |   |   |     |    |   |     |   |
| 4             | Column temperature program | <table border="1"> <thead> <tr> <th>Rate, °C/ min</th> <th>Final temp, °C</th> <th>Hold time at final temp, min</th> </tr> </thead> <tbody> <tr> <td>-</td> <td>100</td> <td>1</td> </tr> <tr> <td>40</td> <td>280</td> <td>0</td> </tr> <tr> <td>1</td> <td>305</td> <td>30</td> </tr> <tr> <td>5</td> <td>310</td> <td>2</td> </tr> </tbody> </table> | Rate, °C/ min | Final temp, °C | Hold time at final temp, min | - | 100 | 1 | 40 | 280 | 0 | 1 | 305 | 30 | 5 | 310 | 2 |
| Rate, °C/ min | Final temp, °C             | Hold time at final temp, min                                                                                                                                                                                                                                                                                                                            |               |                |                              |   |     |   |    |     |   |   |     |    |   |     |   |
| -             | 100                        | 1                                                                                                                                                                                                                                                                                                                                                       |               |                |                              |   |     |   |    |     |   |   |     |    |   |     |   |
| 40            | 280                        | 0                                                                                                                                                                                                                                                                                                                                                       |               |                |                              |   |     |   |    |     |   |   |     |    |   |     |   |
| 1             | 305                        | 30                                                                                                                                                                                                                                                                                                                                                      |               |                |                              |   |     |   |    |     |   |   |     |    |   |     |   |
| 5             | 310                        | 2                                                                                                                                                                                                                                                                                                                                                       |               |                |                              |   |     |   |    |     |   |   |     |    |   |     |   |
| 5             | Column Flow                | 1 mL/min                                                                                                                                                                                                                                                                                                                                                |               |                |                              |   |     |   |    |     |   |   |     |    |   |     |   |
| 6             | GC Injection               | 1 µL, 310 °C, split 1:10                                                                                                                                                                                                                                                                                                                                |               |                |                              |   |     |   |    |     |   |   |     |    |   |     |   |
| 7             | Interface temperature      | 220 °C                                                                                                                                                                                                                                                                                                                                                  |               |                |                              |   |     |   |    |     |   |   |     |    |   |     |   |
| 8             | Carrier gas                | Argon                                                                                                                                                                                                                                                                                                                                                   |               |                |                              |   |     |   |    |     |   |   |     |    |   |     |   |
| 9             | MS                         | GCMS QP2010 Ultra, Ion Source 260 °C                                                                                                                                                                                                                                                                                                                    |               |                |                              |   |     |   |    |     |   |   |     |    |   |     |   |

#### S4. SCXRD data

Table S2: Bond lengths and angles for 4,4'-[di t-butylidibenzo]-18-crown-6 (excluding H atoms)

| Atom-Atom | Length [Å] |
|-----------|------------|
| C43-O9    | 1.373(4)   |
| C40-O8    | 1.405(4)   |
| C41-O8    | 1.403(4)   |
| C29-O7    | 1.362(5)   |
| C39-O7    | 1.423(5)   |
| C2-O6     | 1.363(7)   |
| C28-O6    | 1.420(8)   |
| C26-O5    | 1.440(5)   |
| C27-O5    | 1.382(5)   |
| C16-O4    | 1.369(4)   |
| C25-O4    | 1.435(4)   |
| C14-O3    | 1.439(4)   |
| C15-O3    | 1.343(4)   |
| C86-O24   | 1.374(5)   |
| C121-O24  | 1.447(8)   |
| C221-O24  | 1.45(2)    |
| C223-O23B | 1.59(4)    |
| C222-O23B | 1.399(16)  |
| C122-O23  | 1.361(7)   |
| C123-O23  | 1.418(8)   |
| C126-O22A | 1.35(2)    |
| C224-O22A | 1.50(3)    |
| C100-O22  | 1.381(6)   |
| C124-O22  | 1.422(10)  |
| C98-O21   | 1.426(9)   |
| C127-O21  | 1.809(11)  |
| C99-O21   | 1.264(6)   |

|           |           |
|-----------|-----------|
| C96A-O20A | 1.38(2)   |
| C97-O20A  | 1.354(14) |
| C96-O20   | 1.764(13) |
| C97-O20   | 1.461(12) |
| C12-O2    | 1.351(9)  |
| C13-O2    | 1.441(6)  |
| C85-O19   | 1.359(5)  |
| C95-O19   | 1.370(7)  |
| C58-O18   | 1.343(5)  |
| C84-O18   | 1.429(5)  |
| C82-O17   | 1.422(5)  |
| C83-O17   | 1.407(5)  |
| C72-O16   | 1.386(6)  |
| C81-O16   | 1.427(5)  |
| C70-O15   | 1.424(6)  |
| C71-O15   | 1.329(7)  |
| C68-O14   | 1.405(12) |
| C69-O14   | 1.411(8)  |
| C57-O13   | 1.358(7)  |
| C67-O13   | 1.415(7)  |
| C30-O12   | 1.321(6)  |
| C56-O12   | 1.506(12) |
| C56A-O12  | 1.477(10) |
| C54-O11A  | 1.339(19) |
| C55A-O11A | 1.331(16) |
| C54-O11   | 1.43(2)   |
| C55-O11   | 1.413(18) |
| C44-O10   | 1.358(5)  |
| C53-O10   | 1.411(4)  |
| C1-O1     | 1.373(8)  |
| C11-O1    | 1.408(9)  |
| C7A-C9A   | 1.523(17) |

|          |           |
|----------|-----------|
| C97-C98  | 1.341(11) |
| C95-C96A | 1.43(2)   |
| C95-C96  | 1.360(12) |
| C91-C94  | 1.564(16) |
| C91-C93  | 1.505(12) |
| C91-C92  | 1.506(11) |
| C88-C91  | 1.545(8)  |
| C85-C90  | 1.374(6)  |
| C89-C90  | 1.388(7)  |
| C7-C9    | 1.536(19) |
| C7A-C8A  | 1.512(17) |
| C88-C89  | 1.361(8)  |
| C87-C88  | 1.404(7)  |
| C86-C87  | 1.368(6)  |
| C85-C86  | 1.399(5)  |
| C83-C84  | 1.469(6)  |
| C81-C82  | 1.487(7)  |
| C77-C80  | 1.509(16) |
| C7-C8    | 1.54(2)   |
| C4-C7A   | 1.572(19) |
| C77-C79  | 1.576(15) |
| C77-C78  | 1.510(19) |
| C74-C77  | 1.614(14) |
| C71-C76  | 1.378(9)  |
| C75-C76  | 1.393(13) |
| C74-C75  | 1.391(13) |
| C73-C74  | 1.366(8)  |
| C72-C73  | 1.391(8)  |
| C71-C72  | 1.413(7)  |
| C69-C70  | 1.416(11) |
| C4-C7    | 1.41(4)   |
| C67-C68  | 1.450(12) |

|           |           |
|-----------|-----------|
| C63-C66   | 1.546(11) |
| C63-C65   | 1.545(14) |
| C63-C64   | 1.664(19) |
| C60-C63   | 1.570(13) |
| C57-C62   | 1.379(8)  |
| C61-C62   | 1.419(11) |
| C60-C61   | 1.375(11) |
| C59-C60   | 1.427(7)  |
| C1-C6     | 1.383(9)  |
| C5-C6     | 1.402(15) |
| C58-C59   | 1.382(7)  |
| C57-C58   | 1.411(7)  |
| C55A-C56A | 1.355(18) |
| C55-C56   | 1.610(14) |
| C53-C54   | 1.391(8)  |
| C49-C52   | 1.490(12) |
| C49-C51   | 1.562(11) |
| C49-C50   | 1.574(13) |
| C4-C5     | 1.352(18) |
| C47-C49   | 1.516(8)  |
| C43-C48   | 1.372(5)  |
| C47-C48   | 1.421(6)  |
| C46-C47   | 1.356(7)  |
| C45-C46   | 1.391(7)  |
| C44-C45   | 1.386(6)  |
| C43-C44   | 1.407(4)  |
| C41-C42   | 1.486(5)  |
| C39-C40   | 1.492(6)  |
| C3-C4     | 1.397(15) |
| C35-C38   | 1.28(2)   |
| C35-C37   | 1.477(16) |
| C35-C36   | 1.54(2)   |

|           |           |
|-----------|-----------|
| C33-C35   | 1.502(11) |
| C29-C34   | 1.378(7)  |
| C33-C34   | 1.405(8)  |
| C32-C33   | 1.377(10) |
| C31-C32   | 1.383(9)  |
| C30-C31   | 1.383(6)  |
| C29-C30   | 1.415(6)  |
| C2-C3     | 1.405(8)  |
| C27-C28   | 1.510(9)  |
| C25-C26   | 1.481(6)  |
| C21-C24   | 1.495(8)  |
| C21-C23   | 1.535(8)  |
| C224-C223 | 1.414(18) |
| C222-C221 | 1.44(2)   |
| C21-C22   | 1.508(8)  |
| C18-C21   | 1.507(6)  |
| C15-C20   | 1.381(5)  |
| C19-C20   | 1.394(6)  |
| C1-C2     | 1.394(11) |
| C18-C19   | 1.400(5)  |
| C17-C18   | 1.399(4)  |
| C16-C17   | 1.380(5)  |
| C15-C16   | 1.407(4)  |
| C13-C14   | 1.418(7)  |
| C134-C137 | 1.54(2)   |
| C134-C136 | 1.45(7)   |
| C134-C135 | 1.46(6)   |
| C130-C134 | 1.67(3)   |
| C126-C131 | 1.3900    |
| C130-C131 | 1.3900    |
| C129-C130 | 1.3900    |
| C128-C129 | 1.3900    |



|                         |                  |
|-------------------------|------------------|
| C127-C128               | 1.3900           |
| C126-C127               | 1.3900           |
| C123-C124               | 1.432(12)        |
| C121-C122               | 1.450(16)        |
| C11-C12                 | 1.439(10)        |
| C7A-C10A                | 1.528(18)        |
| C105-C108               | 1.34(2)          |
| C105-C107               | 1.47(3)          |
| C105-C106               | 1.64(3)          |
| C102-C105               | 1.553(11)        |
| C103-C104               | 1.3900           |
| C99-C104                | 1.3900           |
| C102-C103               | 1.3900           |
| C101-C102               | 1.3900           |
| C100-C101               | 1.3900           |
| C99-C100                | 1.3900           |
| C7-C10                  | 1.53(2)          |
| <b>[Atom–Atom–Atom]</b> | <b>Angle [°]</b> |
| C43-O9-C42              | 117.8(3)         |
| C41-O8-C40              | 111.3(3)         |
| C29-O7-C39              | 118.0(3)         |
| C2-O6-C28               | 118.0(5)         |
| C27-O5-C26              | 111.6(4)         |
| C16-O4-C25              | 119.2(2)         |
| C15-O3-C14              | 116.4(3)         |
| C86-O24-C221            | 110(2)           |
| C86-O24-C121            | 119.1(6)         |
| C222-O23B-C223          | 109.8(17)        |
| C122-O23-C123           | 113.2(5)         |
| C126-O22A-C224          | 123.2(19)        |
| C100-O22-C124           | 118.7(5)         |
| C99-O21-C98             | 110.3(5)         |

|               |           |
|---------------|-----------|
| C98-O21-C127  | 134.1(6)  |
| C97-O20A-C96A | 132.8(14) |
| C97-O20-C96   | 90.7(8)   |
| C12-O2-C13    | 109.1(5)  |
| C85-O19-C95   | 118.6(5)  |
| C58-O18-C84   | 117.8(3)  |
| C83-O17-C82   | 109.6(3)  |
| C72-O16-C81   | 116.9(4)  |
| C71-O15-C70   | 117.6(5)  |
| C68-O14-C69   | 107.9(5)  |
| C57-O13-C67   | 118.1(5)  |
| C30-O12-C56A  | 129.6(5)  |
| C30-O12-C56   | 106.5(6)  |
| C54-O11A-C55A | 122.8(12) |
| C54-O11-C55   | 117.2(10) |
| C44-O10-C53   | 118.2(3)  |
| C1-O1-C11     | 118.7(5)  |
| O21-C99-C104  | 128.0(4)  |
| O21-C99-C100  | 112.0(4)  |
| C100-C99-C104 | 120.0     |
| C97-C98-O21   | 106.6(5)  |
| O20A-C97-C98  | 141.7(11) |
| C98-C97-O20   | 110.5(9)  |
| O20A-C96A-C95 | 97.3(12)  |
| C95-C96-O20   | 101.0(8)  |
| O19-C95-C96A  | 119.0(7)  |
| C96-C95-O19   | 114.4(6)  |
| C93-C91-C94   | 111.3(9)  |
| C93-C91-C92   | 110.0(9)  |
| C93-C91-C88   | 111.0(7)  |
| C92-C91-C94   | 107.0(9)  |
| C92-C91-C88   | 109.7(6)  |

|              |           |
|--------------|-----------|
| C88-C91-C94  | 107.8(7)  |
| C85-C90-C89  | 119.6(4)  |
| C88-C89-C90  | 123.1(4)  |
| C89-C88-C91  | 123.8(5)  |
| C89-C88-C87  | 117.1(4)  |
| C87-C88-C91  | 119.1(5)  |
| C86-C87-C88  | 120.7(4)  |
| O24-C86-C85  | 115.2(3)  |
| C87-C86-O24  | 123.5(3)  |
| C87-C86-C85  | 121.2(4)  |
| O19-C85-C90  | 125.3(4)  |
| O19-C85-C86  | 116.4(3)  |
| C90-C85-C86  | 118.3(4)  |
| O18-C84-C83  | 110.4(3)  |
| O17-C83-C84  | 109.5(3)  |
| O17-C82-C81  | 110.6(3)  |
| O16-C81-C82  | 108.2(4)  |
| C9A-C7A-C4   | 112.6(17) |
| C9A-C7A-C10A | 107(2)    |
| C8A-C7A-C9A  | 104.9(19) |
| C8A-C7A-C4   | 106.3(17) |
| C8A-C7A-C10A | 118(3)    |
| C10A-C7A-C4  | 108.8(11) |
| C80-C77-C79  | 110.9(10) |
| C80-C77-C74  | 110.5(11) |
| C79-C77-C74  | 103.0(9)  |
| C78-C77-C80  | 112.1(13) |
| C78-C77-C79  | 108.0(13) |
| C78-C77-C74  | 112.0(7)  |
| C71-C76-C75  | 122.3(7)  |
| C74-C75-C76  | 119.5(6)  |
| C75-C74-C77  | 123.1(7)  |

|             |           |
|-------------|-----------|
| C73-C74-C77 | 117.1(7)  |
| C73-C74-C75 | 119.7(8)  |
| C74-C73-C72 | 120.6(6)  |
| O16-C72-C71 | 114.4(5)  |
| C73-C72-O16 | 124.7(4)  |
| C73-C72-C71 | 120.9(5)  |
| O15-C71-C76 | 126.2(5)  |
| O15-C71-C72 | 116.8(5)  |
| C76-C71-C72 | 117.0(6)  |
| O15-C70-C69 | 111.7(5)  |
| C9-C7-C8    | 102.7(17) |
| C4-C7-C9    | 125(4)    |
| C4-C7-C8    | 113(3)    |
| C4-C7-C10   | 105(3)    |
| C10-C7-C9   | 113(2)    |
| C10-C7-C8   | 94(6)     |
| O14-C69-C70 | 108.1(5)  |
| O14-C68-C67 | 110.3(6)  |
| O13-C67-C68 | 108.8(6)  |
| C66-C63-C65 | 108.8(8)  |
| C66-C63-C64 | 105.7(11) |
| C66-C63-C60 | 110.0(9)  |
| C65-C63-C64 | 116.5(12) |
| C65-C63-C60 | 106.8(10) |
| C60-C63-C64 | 109.1(6)  |
| C57-C62-C61 | 121.0(6)  |
| C60-C61-C62 | 121.4(6)  |
| C61-C60-C63 | 125.5(6)  |
| C61-C60-C59 | 117.2(6)  |
| C59-C60-C63 | 117.3(6)  |
| C1-C6-C5    | 119.1(11) |
| C58-C59-C60 | 121.4(5)  |

|                |           |
|----------------|-----------|
| O18-C58-C59    | 123.8(4)  |
| O18-C58-C57    | 115.4(4)  |
| C59-C58-C57    | 120.7(4)  |
| O13-C57-C62    | 125.8(5)  |
| O13-C57-C58    | 116.0(4)  |
| C62-C57-C58    | 118.2(6)  |
| C55A-C56A-O12  | 104.0(9)  |
| O12-C56-C55    | 103.1(7)  |
| C56A-C55A-O11A | 112.0(11) |
| O11-C55-C56    | 118.4(11) |
| O11A-C54-C53   | 127.5(6)  |
| C53-C54-O11    | 105.3(6)  |
| C54-C53-O10    | 111.2(4)  |
| C4-C5-C6       | 123.6(9)  |
| C52-C49-C51    | 113.9(8)  |
| C52-C49-C50    | 106.9(10) |
| C52-C49-C47    | 110.0(7)  |
| C51-C49-C50    | 105.8(8)  |
| C47-C49-C51    | 112.9(6)  |
| C47-C49-C50    | 106.9(5)  |
| C43-C48-C47    | 121.0(4)  |
| C48-C47-C49    | 119.5(4)  |
| C46-C47-C49    | 122.7(4)  |
| C46-C47-C48    | 117.7(4)  |
| C47-C46-C45    | 121.6(4)  |
| C46-C45-C44    | 121.6(4)  |
| O10-C44-C45    | 127.2(3)  |
| O10-C44-C43    | 115.6(3)  |
| C45-C44-C43    | 117.1(4)  |
| O9-C43-C44     | 113.5(3)  |
| C48-C43-O9     | 125.5(3)  |
| C48-C43-C44    | 121.0(3)  |

|             |           |
|-------------|-----------|
| O9-C42-C41  | 108.5(3)  |
| O8-C41-C42  | 110.9(3)  |
| O8-C40-C39  | 109.8(3)  |
| C5-C4-C7A   | 123.8(12) |
| C5-C4-C7    | 111(3)    |
| C5-C4-C3    | 117.0(8)  |
| C3-C4-C7A   | 119.1(15) |
| C3-C4-C7    | 128(3)    |
| O7-C39-C40  | 109.2(3)  |
| C38-C35-C37 | 114.8(14) |
| C38-C35-C36 | 97(2)     |
| C38-C35-C33 | 115.6(12) |
| C37-C35-C36 | 101.7(15) |
| C37-C35-C33 | 116.5(11) |
| C33-C35-C36 | 107.5(10) |
| C29-C34-C33 | 120.9(5)  |
| C34-C33-C35 | 119.7(7)  |
| C32-C33-C35 | 122.9(6)  |
| C32-C33-C34 | 117.3(5)  |
| C33-C32-C31 | 122.2(5)  |
| C32-C31-C30 | 121.2(5)  |
| O12-C30-C31 | 125.1(4)  |
| O12-C30-C29 | 117.7(4)  |
| C31-C30-C29 | 117.2(5)  |
| C4-C3-C2    | 121.5(11) |
| O7-C29-C34  | 123.4(4)  |
| O7-C29-C30  | 115.4(4)  |
| C34-C29-C30 | 121.2(4)  |
| O6-C28-C27  | 108.6(4)  |
| O5-C27-C28  | 110.3(4)  |
| O5-C26-C25  | 109.8(3)  |
| O4-C25-C26  | 107.8(3)  |

|                |           |
|----------------|-----------|
| C223-C224-O22A | 107.6(18) |
| C224-C223-O23B | 97(2)     |
| O23B-C222-C221 | 121(5)    |
| C222-C221-O24  | 95.9(17)  |
| C24-C21-C23    | 112.8(7)  |
| C24-C21-C22    | 105.1(7)  |
| C24-C21-C18    | 113.7(5)  |
| C22-C21-C23    | 106.9(6)  |
| C18-C21-C23    | 108.4(4)  |
| C18-C21-C22    | 109.7(4)  |
| C15-C20-C19    | 121.0(3)  |
| O6-C2-C3       | 125.0(8)  |
| O6-C2-C1       | 115.4(5)  |
| C1-C2-C3       | 119.6(7)  |
| C18-C19-C20    | 121.3(3)  |
| C19-C18-C21    | 121.0(3)  |
| C19-C18-C17    | 116.8(3)  |
| C17-C18-C21    | 122.1(3)  |
| C16-C17-C18    | 122.4(3)  |
| O4-C16-C17     | 125.0(3)  |
| O4-C16-C15     | 115.0(3)  |
| C17-C16-C15    | 120.0(3)  |
| O3-C15-C20     | 125.8(3)  |
| O3-C15-C16     | 115.7(3)  |
| C20-C15-C16    | 118.5(3)  |
| C13-C14-O3     | 109.9(4)  |
| C137-C134-C130 | 112(2)    |
| C136-C134-C137 | 113(4)    |
| C136-C134-C130 | 110(4)    |
| C135-C134-C137 | 109(5)    |
| C135-C134-C136 | 114(3)    |
| C135-C134-C130 | 99(3)     |

|                |           |
|----------------|-----------|
| C130-C131-C126 | 120.0     |
| C131-C130-C134 | 119(2)    |
| C131-C130-C129 | 120.0     |
| C129-C130-C134 | 121(2)    |
| C14-C13-O2     | 107.9(4)  |
| C130-C129-C128 | 120.0     |
| C129-C128-C127 | 120.0     |
| C128-C127-O21  | 116.6(7)  |
| C126-C127-O21  | 123.3(7)  |
| C126-C127-C128 | 120.0     |
| O22A-C126-C131 | 120.6(13) |
| O22A-C126-C127 | 119.3(13) |
| C127-C126-C131 | 120.0     |
| C123-C124-O22  | 109.9(5)  |
| C124-C123-O23  | 114.6(6)  |
| O23-C122-C121  | 115.5(14) |
| O24-C121-C122  | 112.2(10) |
| O2-C12-C11     | 113.6(6)  |
| O1-C11-C12     | 108.8(5)  |
| C108-C105-C107 | 125(2)    |
| C108-C105-C106 | 107.1(19) |
| C108-C105-C102 | 113.5(10) |
| C107-C105-C106 | 91.8(16)  |
| C107-C105-C102 | 107.5(12) |
| C102-C105-C106 | 109.8(14) |
| C103-C104-C99  | 120.0     |
| C102-C103-C104 | 120.0     |
| C103-C102-C105 | 118.6(7)  |
| C103-C102-C101 | 120.0     |
| C101-C102-C105 | 121.4(7)  |
| C100-C101-C102 | 120.0     |
| O22-C100-C99   | 113.7(3)  |



|               |          |
|---------------|----------|
| O22-C100-C101 | 126.3(3) |
| C101-C100-C99 | 120.0    |
| O1-C1-C6      | 124.5(9) |
| O1-C1-C2      | 116.3(5) |
| C2-C1-C6      | 119.1(7) |
